# Supplementary material for: Alumina membrane coated activated carbon: a novel strategy to enhance the mechanical properties of a solid catalyst
Source: Royal Society of Chemistry journal article supplement (doi:10.1039/c5ra23769f), 2016-01-01
Supplement: c5ra23769f1.pdf [file c5ra23769f1.pdf]

## Alumina membrane coated activated carbon: A novel strategy to enhance mechanical properties of solid catalyst

Dang-guo Cheng <sup>a</sup>, Weiyang Jin <sup>a,b</sup>, Xiaoli Zhan <sup>a</sup>, Fengqiu Chen <sup>a,b,\*</sup>

<sup>a</sup> College of Chemical and Biological Engineering, Zhejiang University, Hangzhou 310027, China

<sup>b</sup> Key Laboratory of Biomass Chemical Engineering of Ministry of Education, Zhejiang University,  
Hangzhou 310027, China

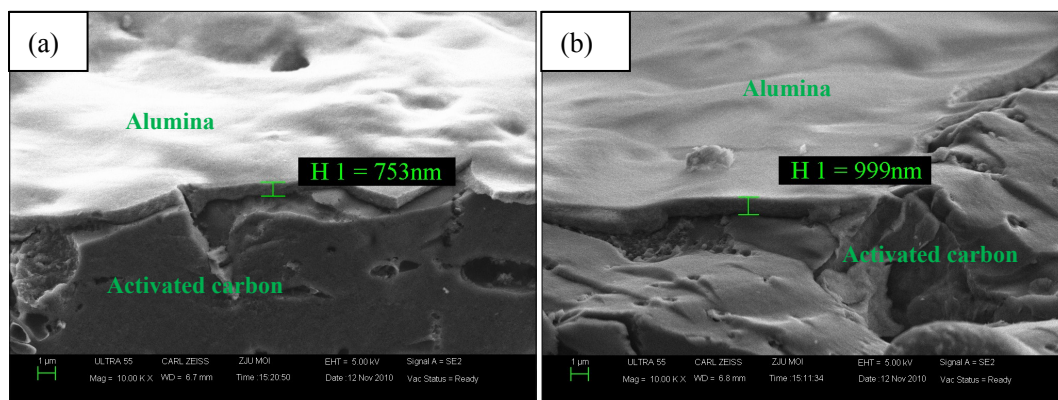

**Figure S1.** SEM images of alumina membrane coated activated carbon (a) two-time coating, (b) three-time coating

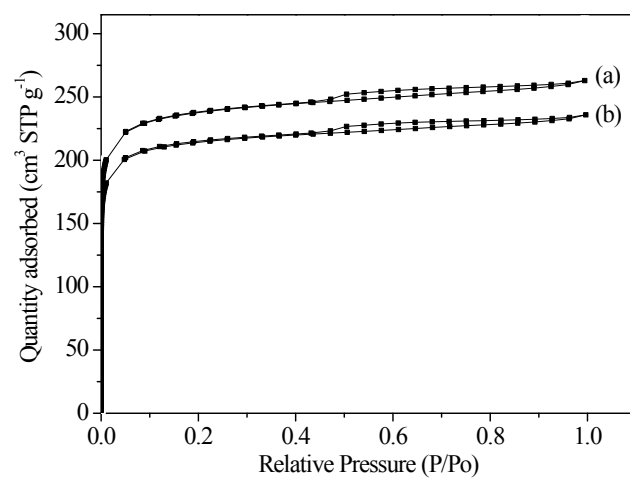

**Figure S2.** N<sub>2</sub> adsorption isotherms of the samples (a) two-time coating, (b) three-time coating
